# Supplementary material
Source: Springer Nature journal article supplement (https://www.springermedizin.de/resource/supplementary/12947_2014_533_MOESM4_ESM.pdf/9555970)

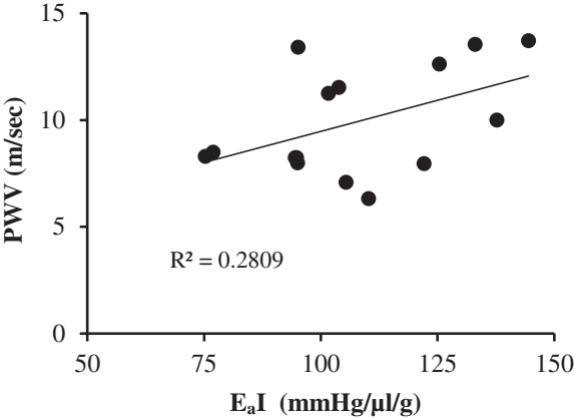

Supplement: MOESM4 [file 9555970]
